# Supplementary material for: AI-enabled alkaline-resistant evolution of protein to apply in mass production
Source: eLife. 2025 Feb 19;13:RP102788. doi: 10.7554/eLife.102788 (PMC11839161; doi:10.7554/eLife.102788)
Supplement: Figure 1—source data 1. [file elife-102788-fig1-data1.xlsx]

## Sheet: Figure 1
	Normalized EC50	Tm			Normalized EC50	Tm
figure A	0.3 M NaOH for 24h	Tm(℃)		figure B	0.5 M NaOH for 24h	Tm(℃)
WT	1	41.955		WT	1	41.955
A57D	0.0712882	43.278		L49V	0.55333	42.707
P29T	0.106382	43.32		A15P	0.61299	43.489
A15P	0.108007	43.489		W112F	0.69757	43.266
N85Q	0.111676	45.312		R20T	0.84442	44.27
V113D	0.136417	42.367		P117Q	1.0416	43.419
G134R	0.20076	42.716		L12K	1.0534	45.416
P117Q	0.215437	43.419		P29T	1.21386	43.32
N78S	0.224348	43.03		A57D	1.53977	43.278
R20T	0.294195	44.27		N78S	1.79569	43.03
R110E	0.337177	43.763		G134R	1.86002	42.716
L49V	0.344516	42.707		V113D	2.27892	42.367
T58K	0.519853	43.898		T58K	3.21823	43.898
D114Y	0.844319	40		R110E	4.34339	43.763
W112F	0.867776	43.266		A57D;P29T	0.32264	50.6534
L12K	0.915607	45.416		A57D;D114Y;W112F	0.33368	47.5611
A13V	1.0211	42.367		A15P;R20T	0.37155	50.481
N85S	1.23994	43.327		A15P;P117Q	0.42305	44.3471
N78K	1.24846	41.595		A57D;G134R;D114Y	0.46009	49.7969
G132H	1.26458	42.866		A15P;R110E	0.80729	43.7568
Q83D	1.41266	43.6406		A57D;G134R;W112F	0.84303	48.9285
S22T	1.41659	42.524		A57D;R110E;W112F	1.13703	46.6472
G16R	1.57909	42.356		A15P;G134R	1.20448	45.1412
A77K	1.5804	43.315		P29T;A15P	1.243	51.9795
E30S	1.61447	41.7		A57D;P117Q;R110E	1.31926	50.9494
F101A	1.6813	42.017		P29T;G134R	1.60167	51.6367
S124T	2.03774	43.84		A57D;G134R;R110E	2.04073	50.6944
E53T	2.16879	38.897		A57D;G134R;R110E;D114Y	2.89535	45.042
I55T	2.29066	44.696		A57D;G134R;R110E;W112F	4.04036	46.994
D90E	2.56978	42.551		A57D;R110E;D114Y	4.89732	48.6522
R108E	2.68117	43.87		A57D;G134R;P117Q;R110E	5.41619	50.5742
H111D	2.75717	40.211		A57D;G134R;R110E;L49V	5.59127	48.5771
T119V	2.91181	44.7206		A57D;R110E	7.20545	50.5573
D114W	2.91836	41.434		A57D;R110E;L49V	12.3039	48.3502
D114V	2.93277	41.273
N85D	3.31411	41.454
M28L	3.86319	48.325
M28R	4.4162	43.321
G135H	4.80671	42.937
L81Y	5.20771	41.756
R108S	5.50649	42.077
S86N	6.15385	42.781
S86Q	7.58878	42.56
T79Q	7.60844	43.245
N78Q	9.85716	42.784
T79N	12.5934	40.413
