# Supplementary material for: AI-enabled alkaline-resistant evolution of protein to apply in mass production
Source: eLife. 2025 Feb 19;13:RP102788. doi: 10.7554/eLife.102788 (PMC11839161; doi:10.7554/eLife.102788)
Supplement: Figure 3—source data 1. [file elife-102788-fig3-data1.xlsx]

## Sheet: Figure 3
	Fraction of small bands(%)
WT	61.1004
L49V	23.5641
G134R	23.5641
A15P	25.1775
N78S	29.0928
P29T	29.3046
P117Q	37.6571
W112F	38.1013
L12K	38.9751
A57D	39.9648
R20T	46.4232
A57D;G134R;D114Y	13.645
A57D;G134R;R110E	21.5659
P29T;G134R	25.6332
A57D;R110E	25.9567
A15P;P117Q	27.6422
A57D;G134R;R110E;L49V	27.7391
A15P;R20T	28.0254
A57D;G134R;R110E;D114Y	28.4896
A57D;G134R;R110E;W112F	28.6668
P29T;A15P	28.9472
A57D;G134R;W112F	29.7483
A15P;G134R	29.9384
A57D;G134R;P117Q;R110E	31.9283
A57D;R110E;W112F	32.9505
A57D;P117Q;R110E	35.1166
A57D;R110E;L49V	37.6847
A15P;R110E	41.8682
A57D;D114Y;W112F	42.1525
A57D;R110E;D114Y	44.0803
A57D;P29T	44.7441
