# Supplementary material for: AI-enabled alkaline-resistant evolution of protein to apply in mass production
Source: eLife. 2025 Feb 19;13:RP102788. doi: 10.7554/eLife.102788 (PMC11839161; doi:10.7554/eLife.102788)
Supplement: Figure 4—source data 1. [file elife-102788-fig4-data1.xlsx]

## Sheet: Figure 4
	Normalization EC50
	salt dissociation	acid dissociation	acid resistance
WT	1	1	1
A57D;P29T	0.83359	0.56652	0.77664
A57D;D114Y;W112F	1.43442	2.08672	1.57486
A15P;R20T	0.72855	0.34172	0.64102
A15P;P117Q	1.19494	0.3947	0.66158
A57D;G134R;D114Y	1.51387	17.3154	1.25716
A15P;R110E	1.10326	10.8998	2.72688
A57D;G134R;W112F	0.85106	1.24153	1.51158
	Ratio of residual DBC
	6h	24h
WT	25.92	15.2
L49V	72.98	51.84
G134R	41.28	23.58
A15P;R20T	79.53	35.27
A15P;P117Q	63.8	26.59
A57D;G134R;D114Y	82.76	55.58
A57D;G134R;R110E	90.04	56.21
Number of Cycles	Yield(%)
8	88.71
16	86.91
24	80.3
32	86.4
40	79.32
48	79.59
56	82
64	87.16
68	77.56
84	84.17
88	82.79
92	82.41
96	76.75
100	84.44
104	83.84
108	80.83
112	80.13
116	78.86
120	76.28
124	78.12
128	77.65
132	73.09
136	74.42
140	76.87
144	75.57
